# Supplementary material
Source: publisher site journal article supplement (https://www.dovepress.com/get_supplementary_file.php?f=495089.docx)
Supplement: Supplementary file 1 [file get_supplementary_file.php]

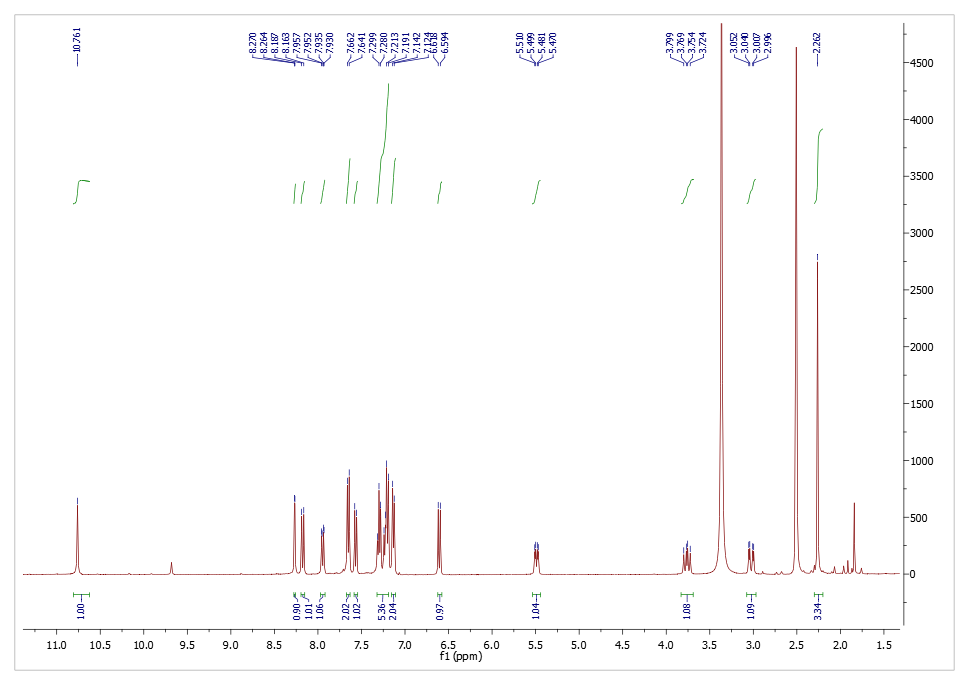


**Figure S1.** 1HNMR of compound **6a**


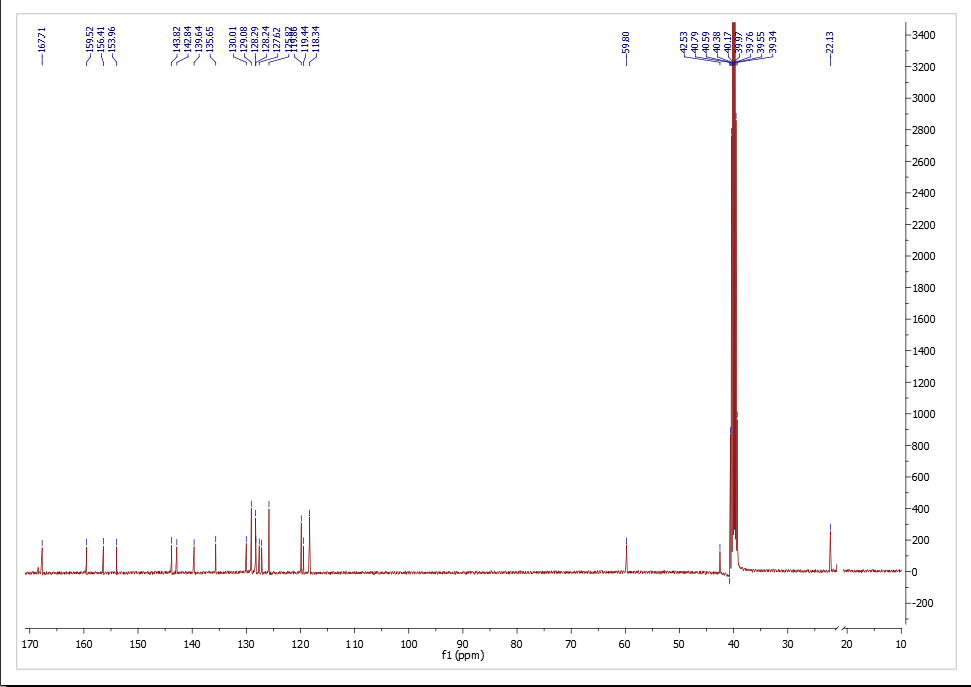


**Figure S2.** 13C NMR of compound **6a**


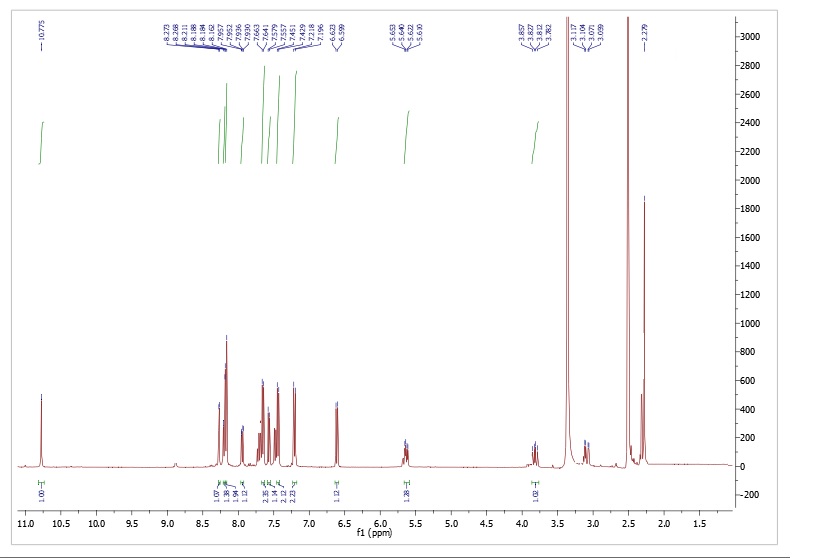


**Figure S3.** 1H NMR of compound **6b**


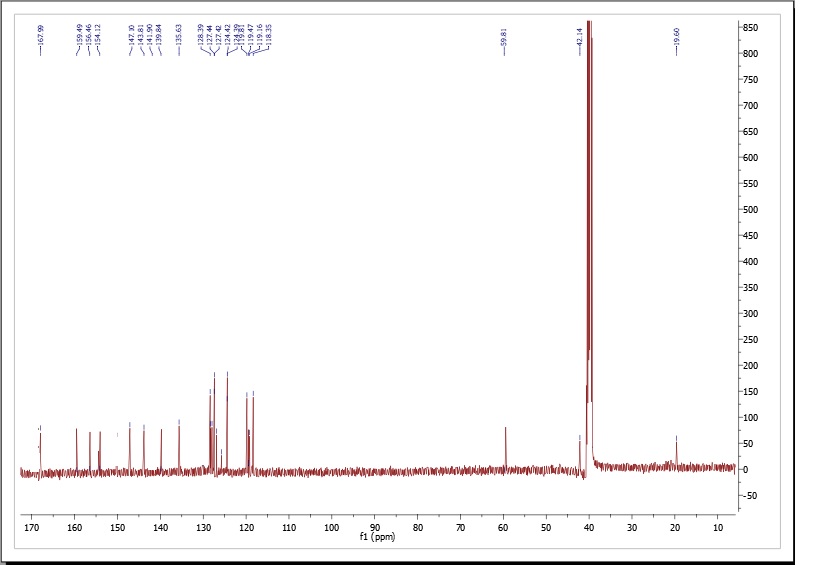


**Figure S4.** 13C NMR of compound **6b**


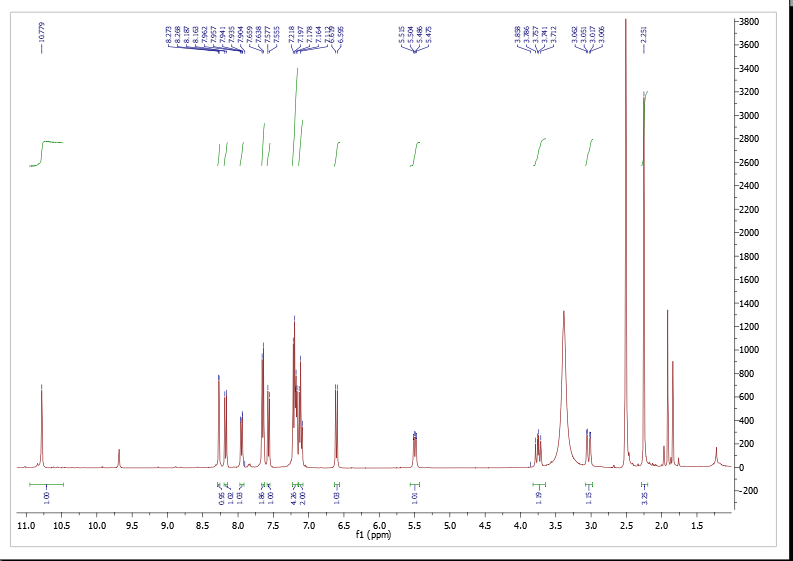


**Figure S5.** 1H NMR of compound **6c**


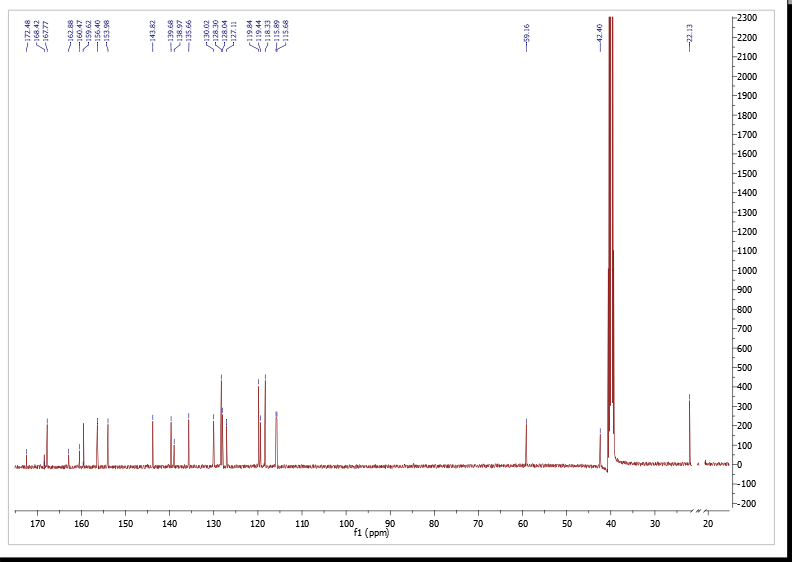


**Figure S6.** 13C NMR of compound **6c**


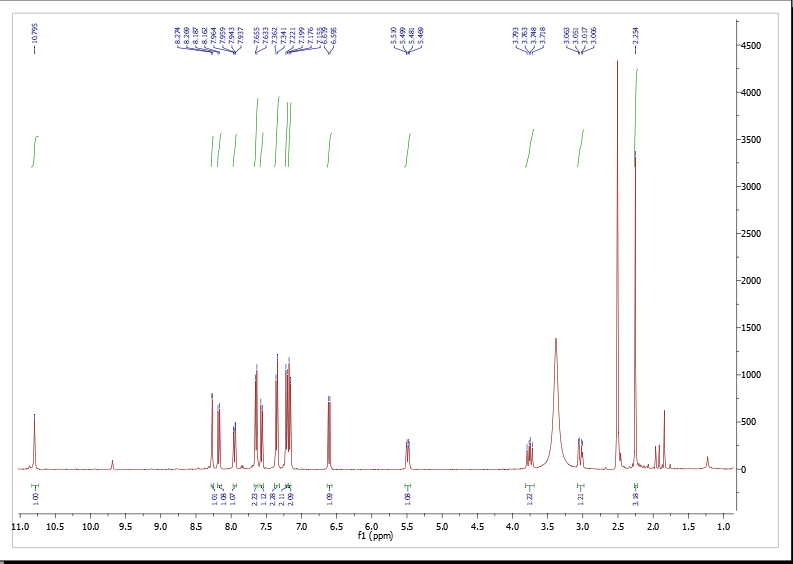


**Figure S7.** 1H NMR of compound **6d**


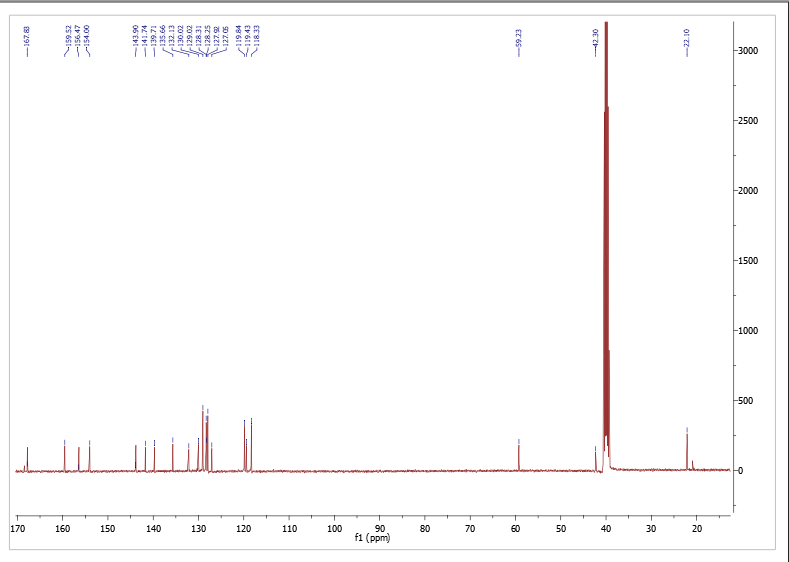


**Figure S8.** 13C NMR of compound **6d**


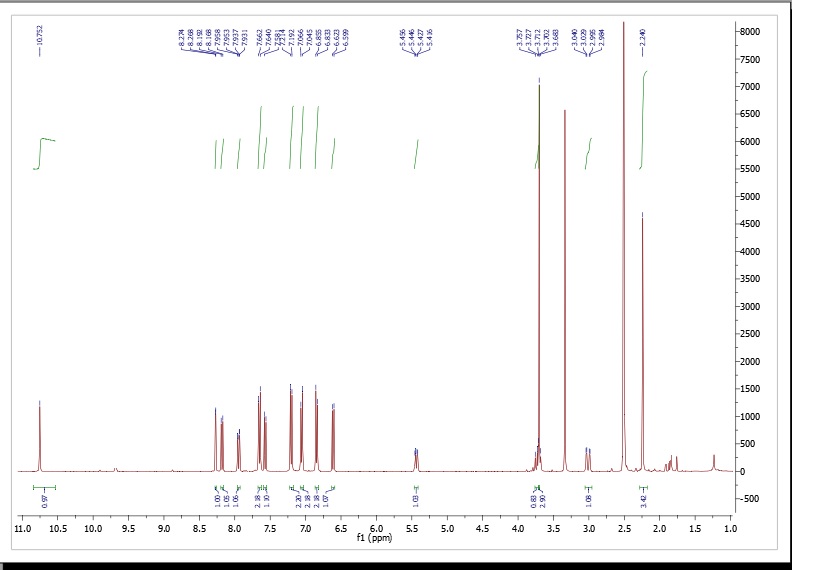


**Figure S9.** 1H NMR of compound **6e**


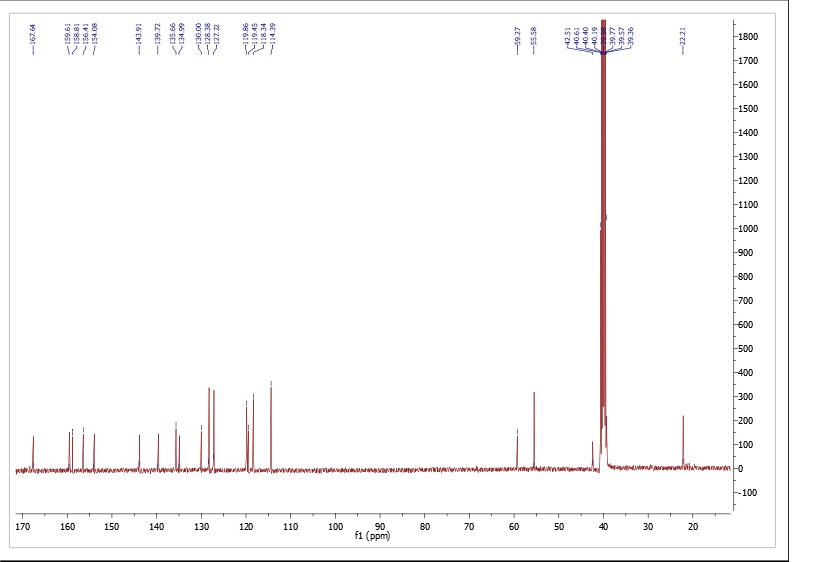


**Figure S10.** 13C NMR of compound **6e**


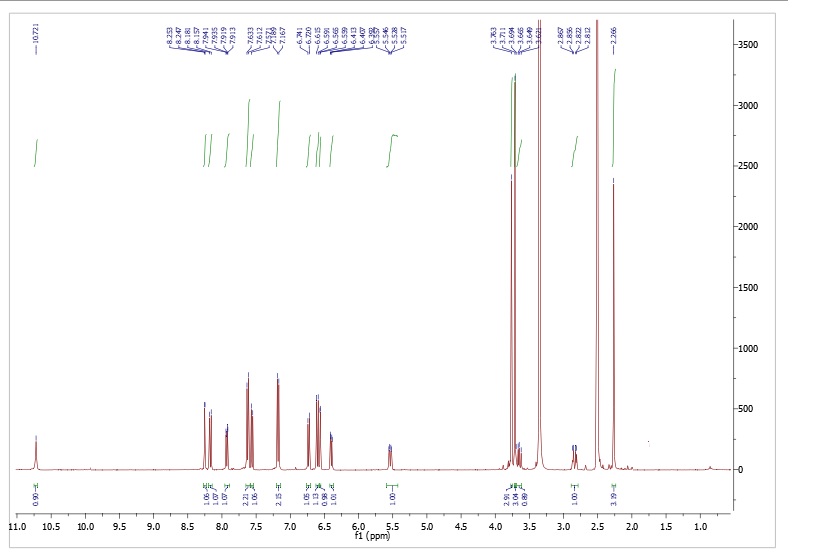


**Figure S11.** 1H NMR of compound **6f**


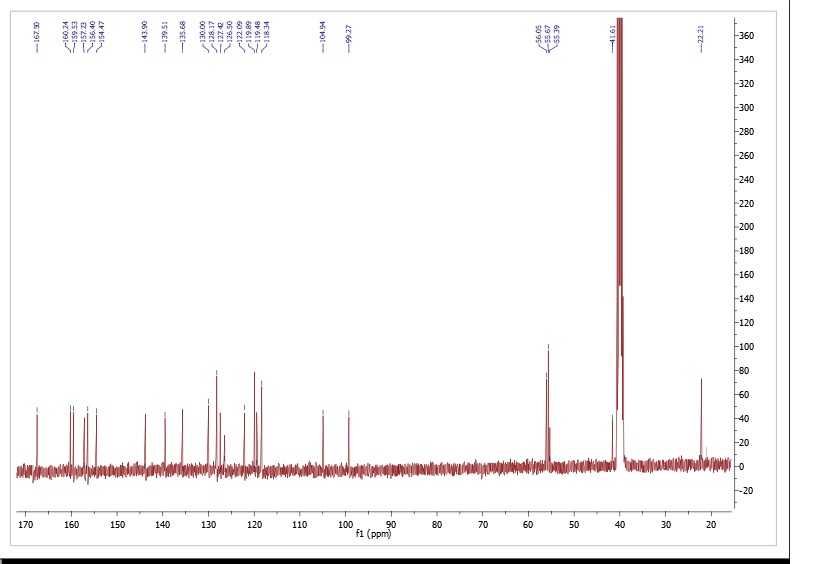


**Figure S12.** 13C NMR of compound **6f**


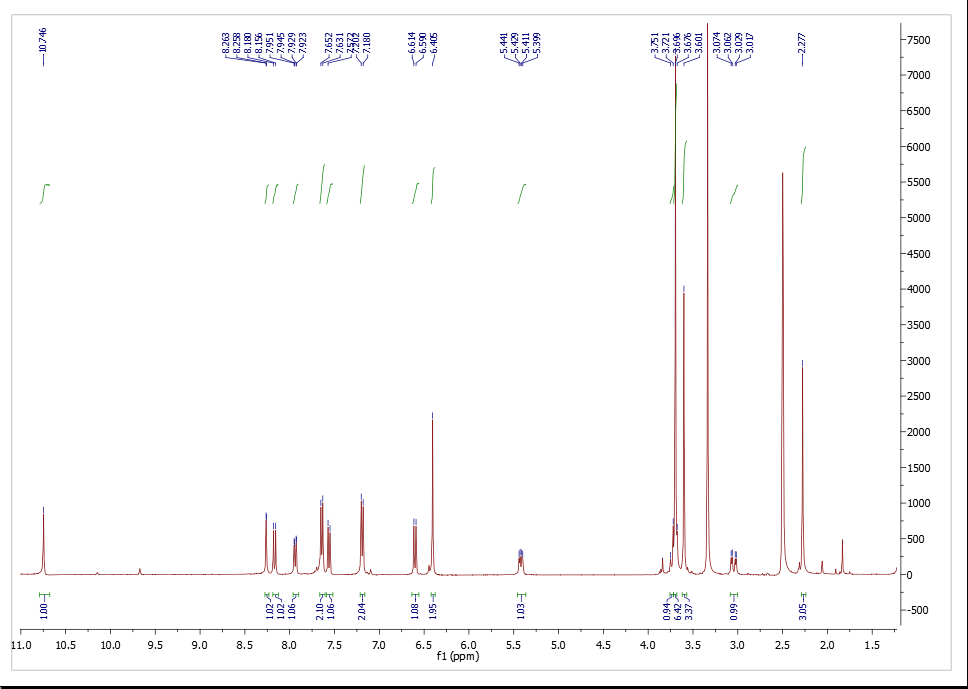


**Figure S13.** 1H NMR of compound **6g**


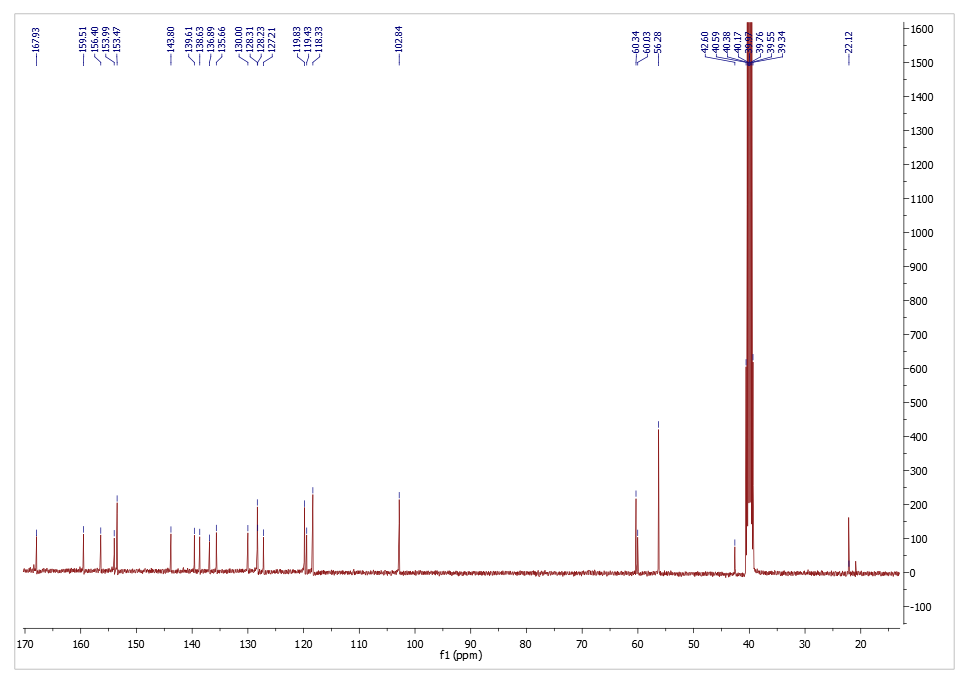


**Figure S14.** 13C NMR of compound **6g**


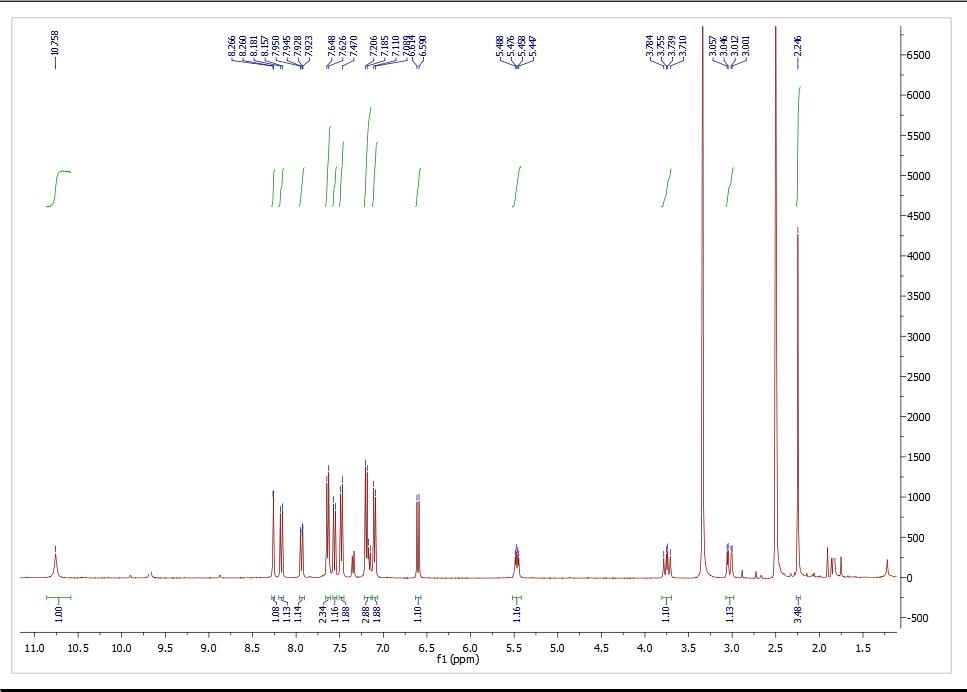


**Figure S15.** 1H NMR of compound **6h**


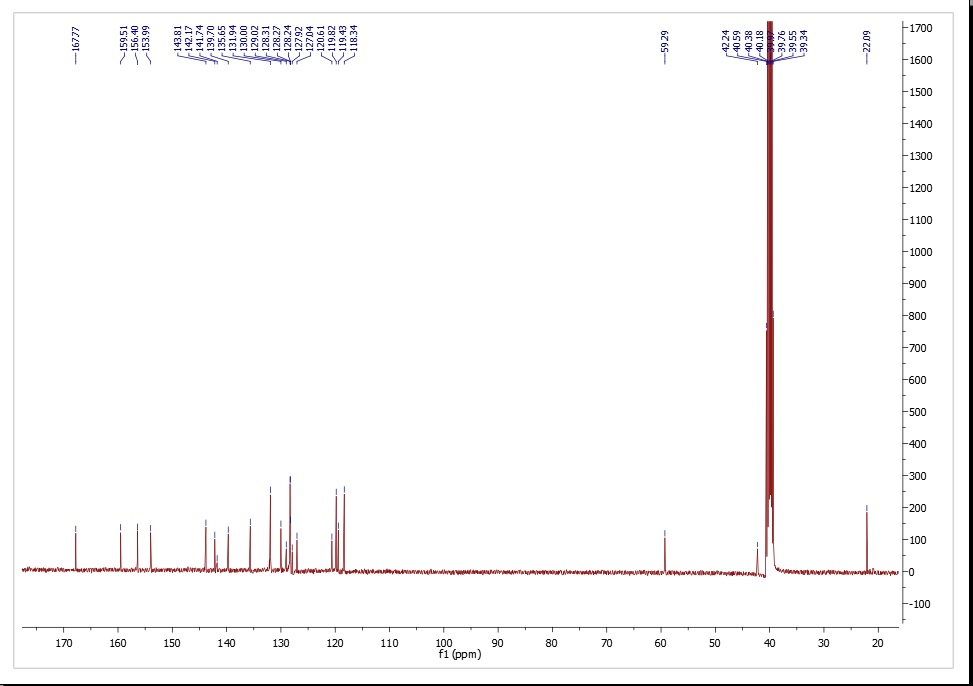


**Figure S16.** 13C NMR of compound **6h**


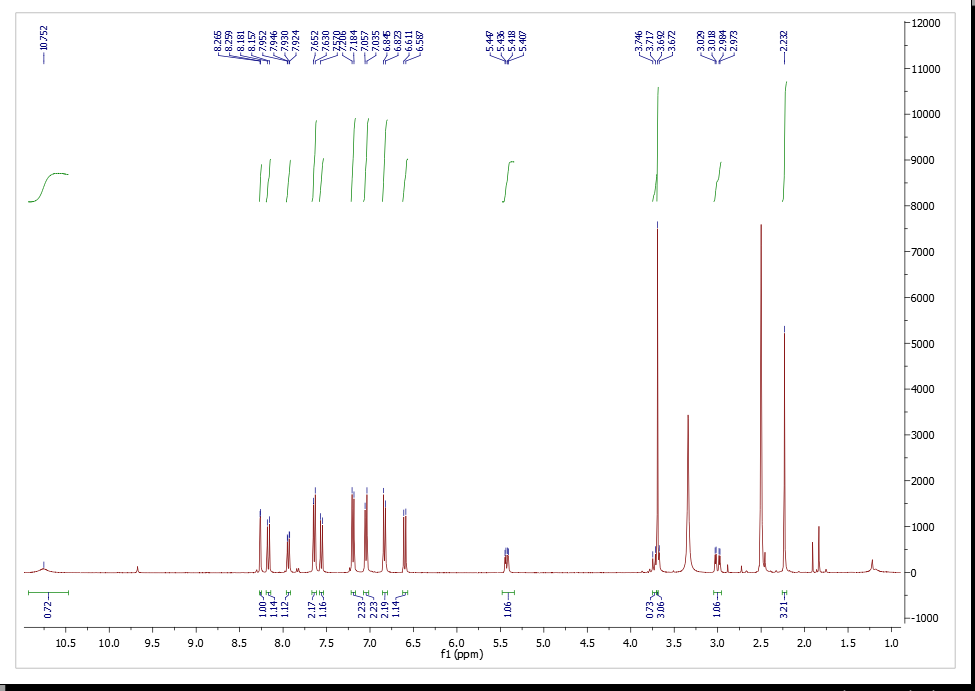


**Figure S17.** 1H NMR of compound **6i**


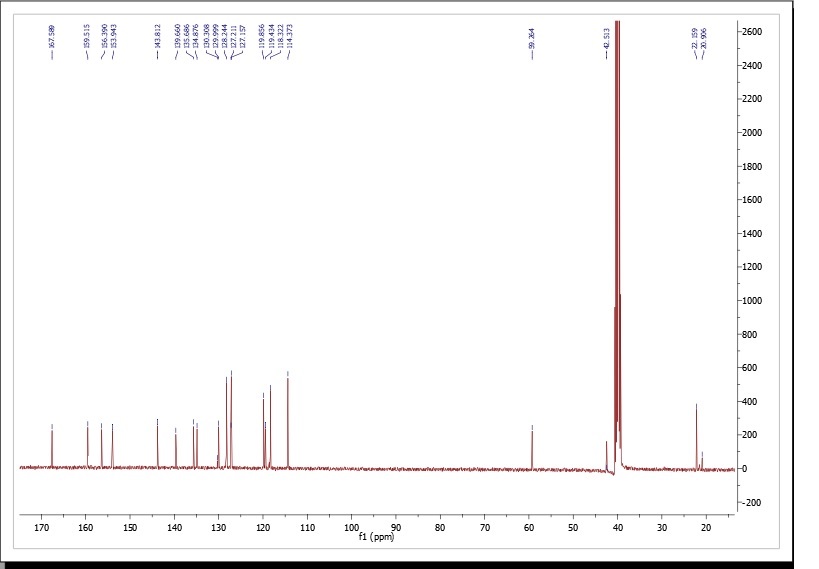


**Figure S18.** 13C NMR of compound **6i**
